# Supplementary material for: Ancient DNA, lipid biomarkers and palaeoecological evidence reveals construction and life on early medieval lake settlements
Source: PubMed Central journal article supplement (PMC8175756; doi:10.1038/s41598-021-91057-x), 2021-06-03
Supplement: 41598_2021_91057_MOESM3_ESM.pdf [file 41598_2021_91057_MOESM3_ESM.pdf]

# Ancient DNA, Lipid Biomarkers and Palaeoecological Evidence Reveals Construction and Life on early Medieval Lake Settlements

## Supplementary Information

A.G. Brown\*, M. Van Hardenbroek, T. Fonville, K. Davies, H. Mackay, E. Murray, K. Head, P. Barratt, F. McCormick, G.F. Ficetola, L. Gielly, A.C.G. Henderson, A. Crone, G. Cavers, P. G. Langdon, N. J. Whitehouse, N. J., D. Pirrie, I. G. Alsos

Corresponding author. Email: [antony.g.brown@uit.no](mailto:antony.g.brown@uit.no)

### **This PDF file includes:**

Figures 1-7

Tables 1-5

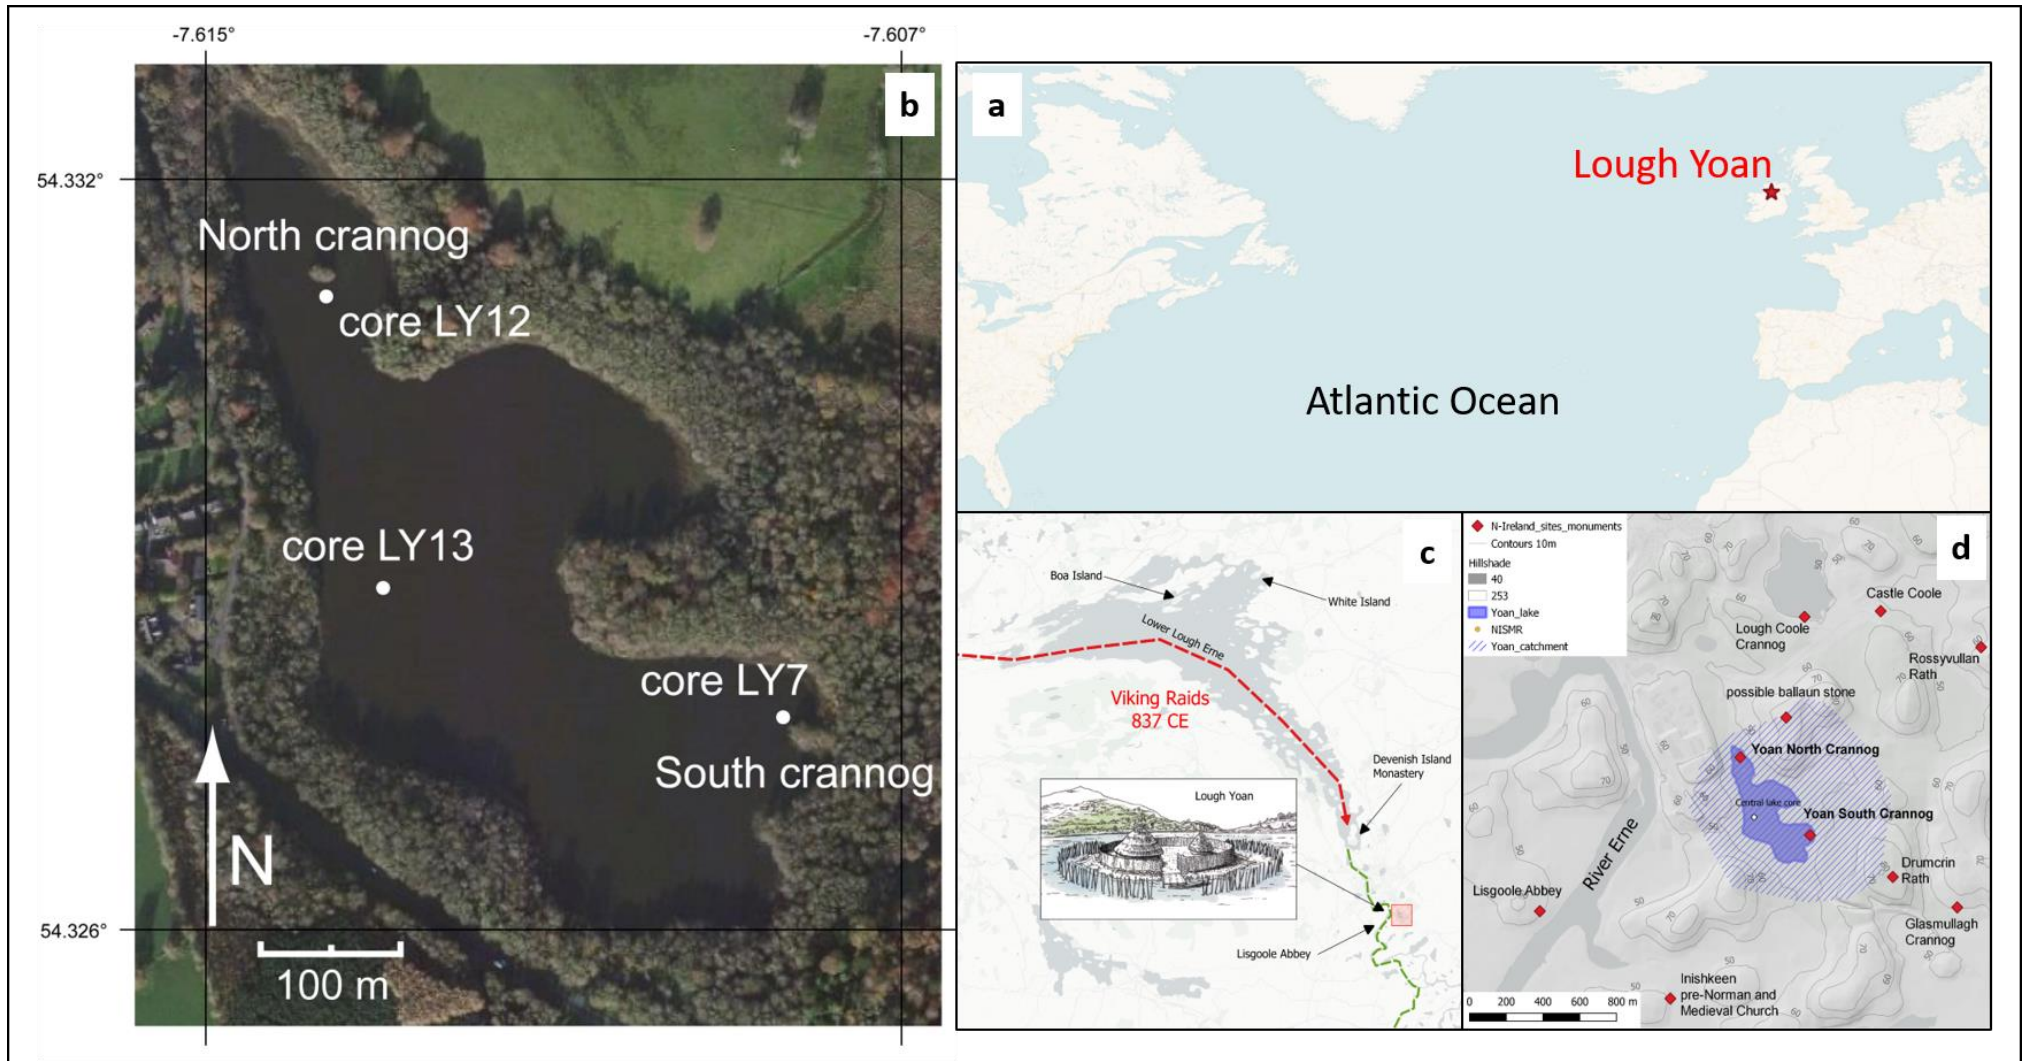

Fig. 1 . a) site location in northern Ireland, b) the Lough Yoan with coring sites mentioned in the text, c) location in the Upper Lough Erne system, Viking raid (837 CE) and clan boundary, d) archaeological sites in the surrounding area and Lough catchment. Fig. 1b used material under Copyright 2021 Google Image Landsat/Copernicus Data S10. NOAA.U.S.Navy. NGA. GEBCO used under Creative Commons License 4.0

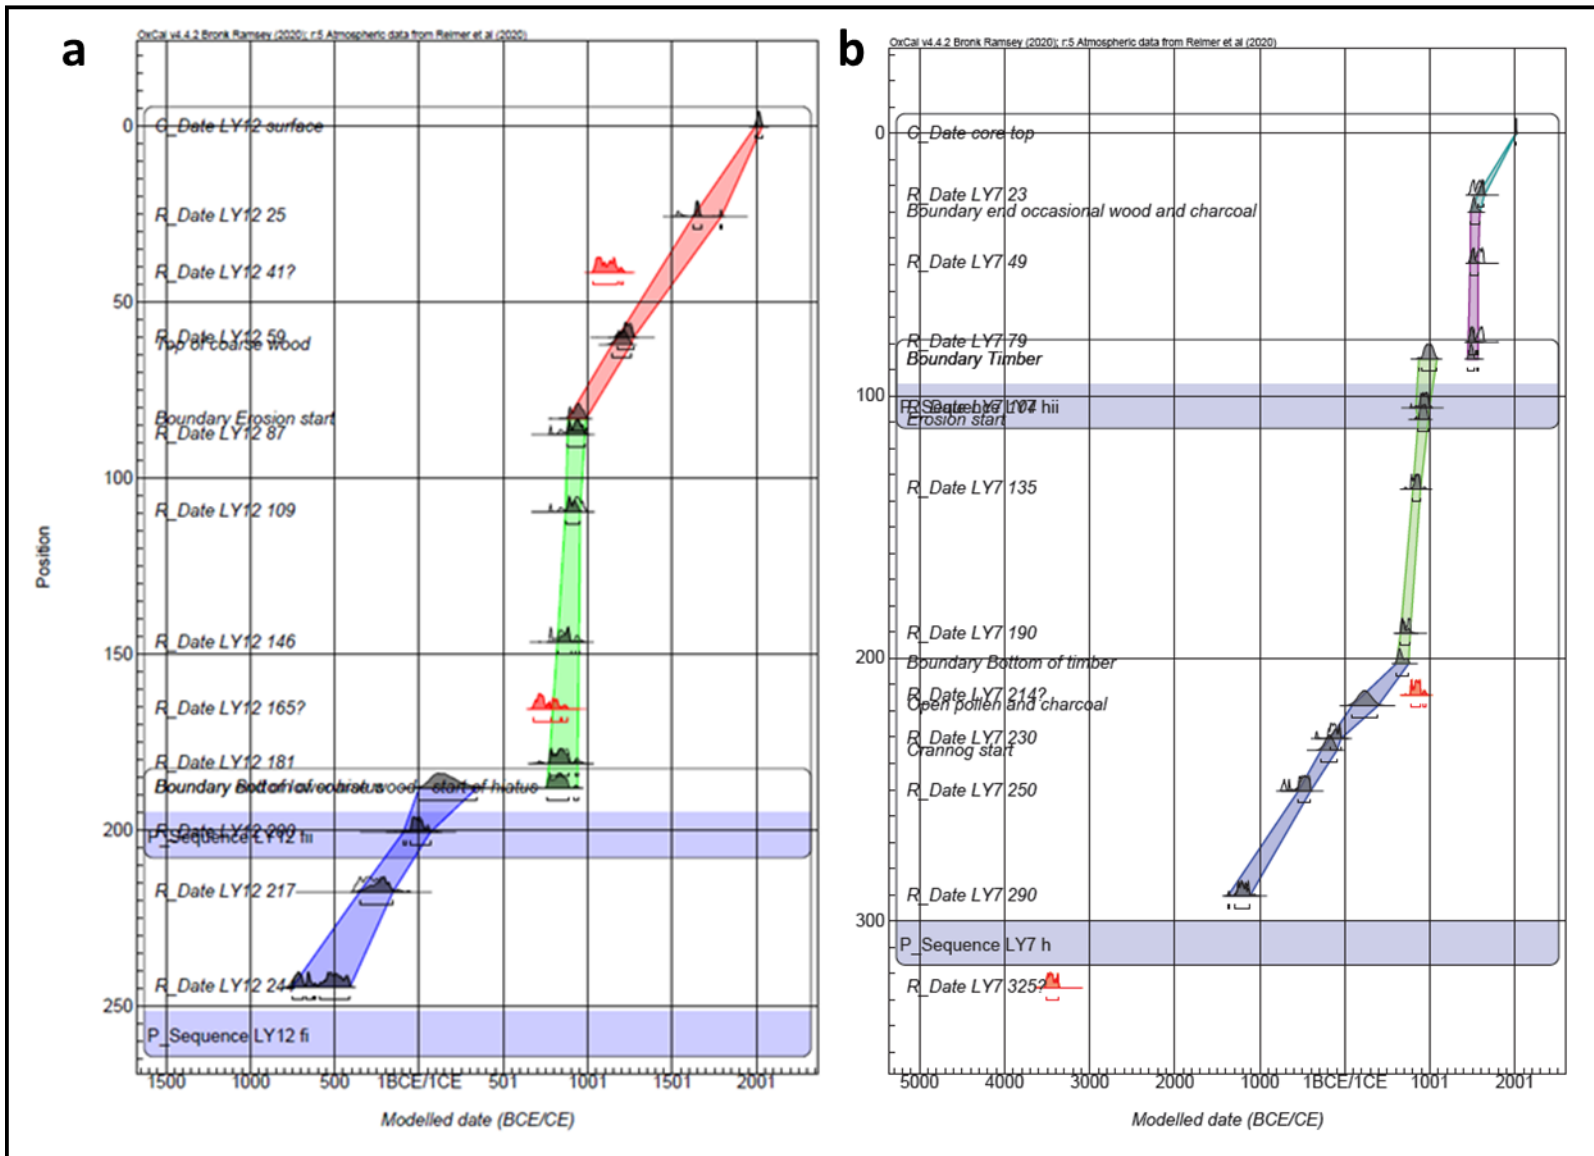

Fig. 2(a) Preferred OxCal model for northern crannog. (b) OxCal model for southern crannog with hiatus and medieval re-occupation, dates in red are excluded from the model

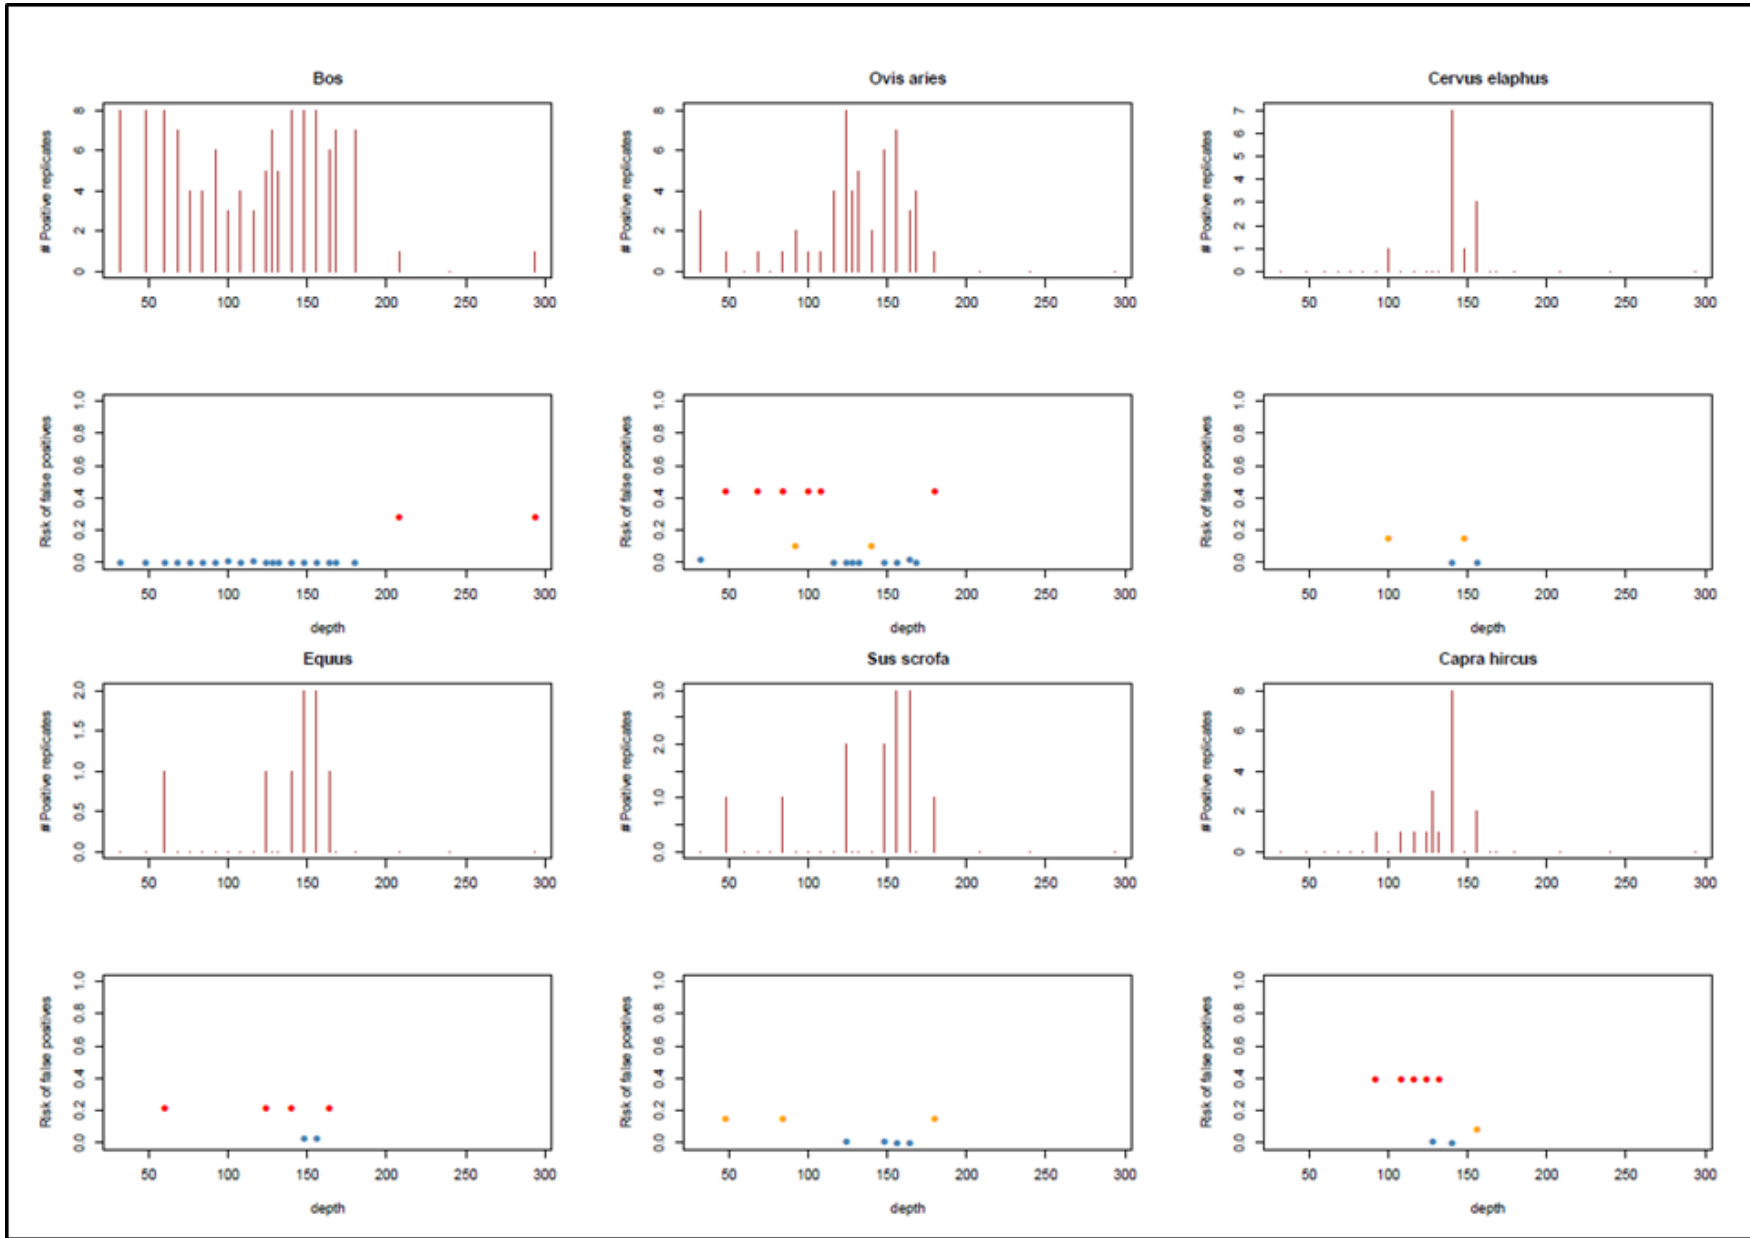

Fig. 3. Mammal sedaDNA metabarcoding reliability modelling: the CAR-SODM approach <sup>(15)</sup> for selected species.

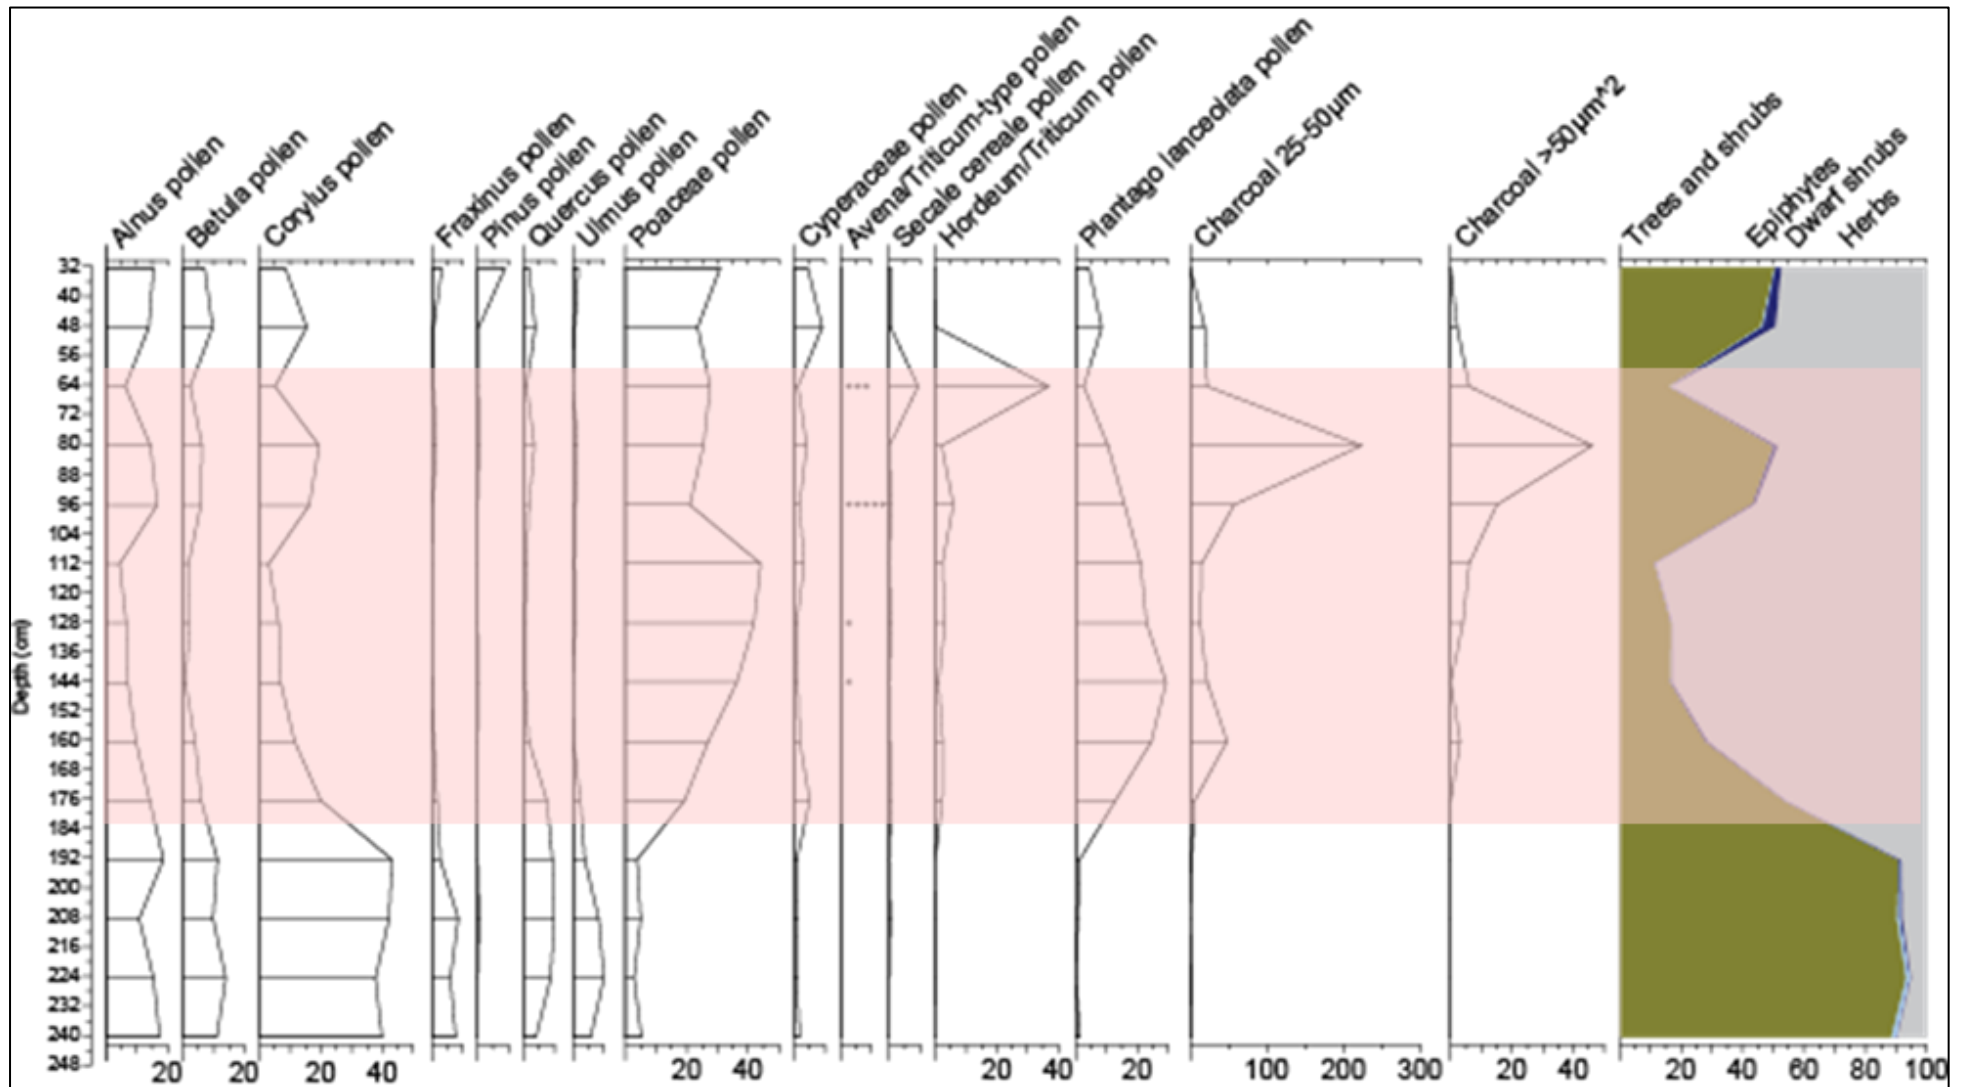

Fig. 4. Summary pollen diagram for Northern Crannog lake core (LY12). Pink shading covers the levels that accumulated during the crannog period.

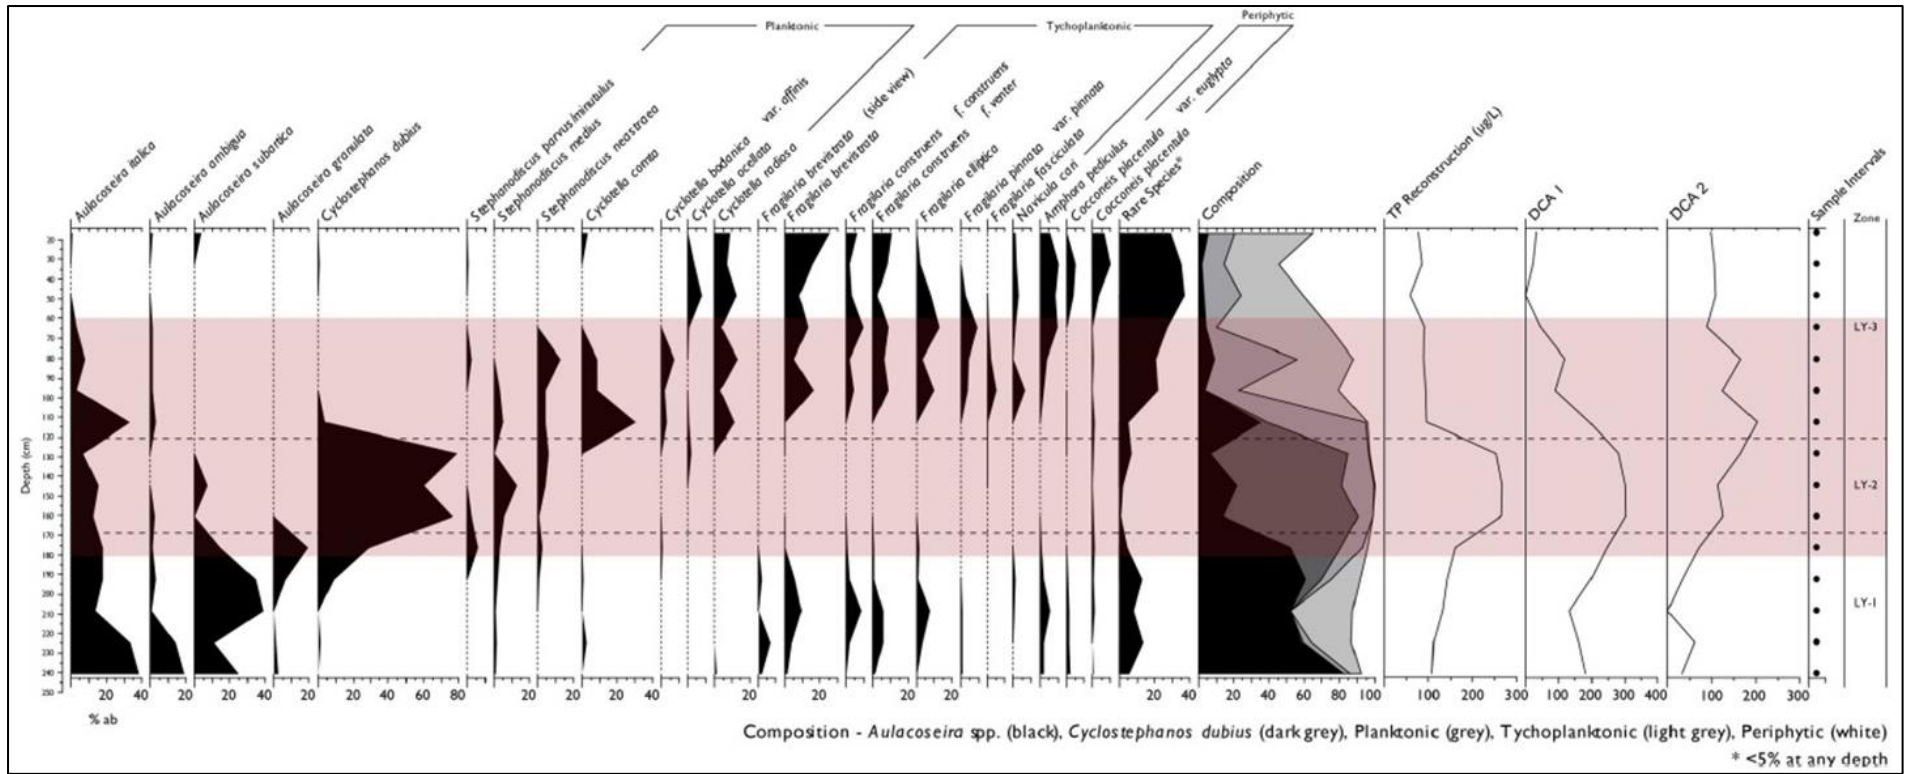

Fig. 5. Summary diatom diagram for northern crannog lake core (LY12). Pink shading covers the levels that accumulated during the crannog period.



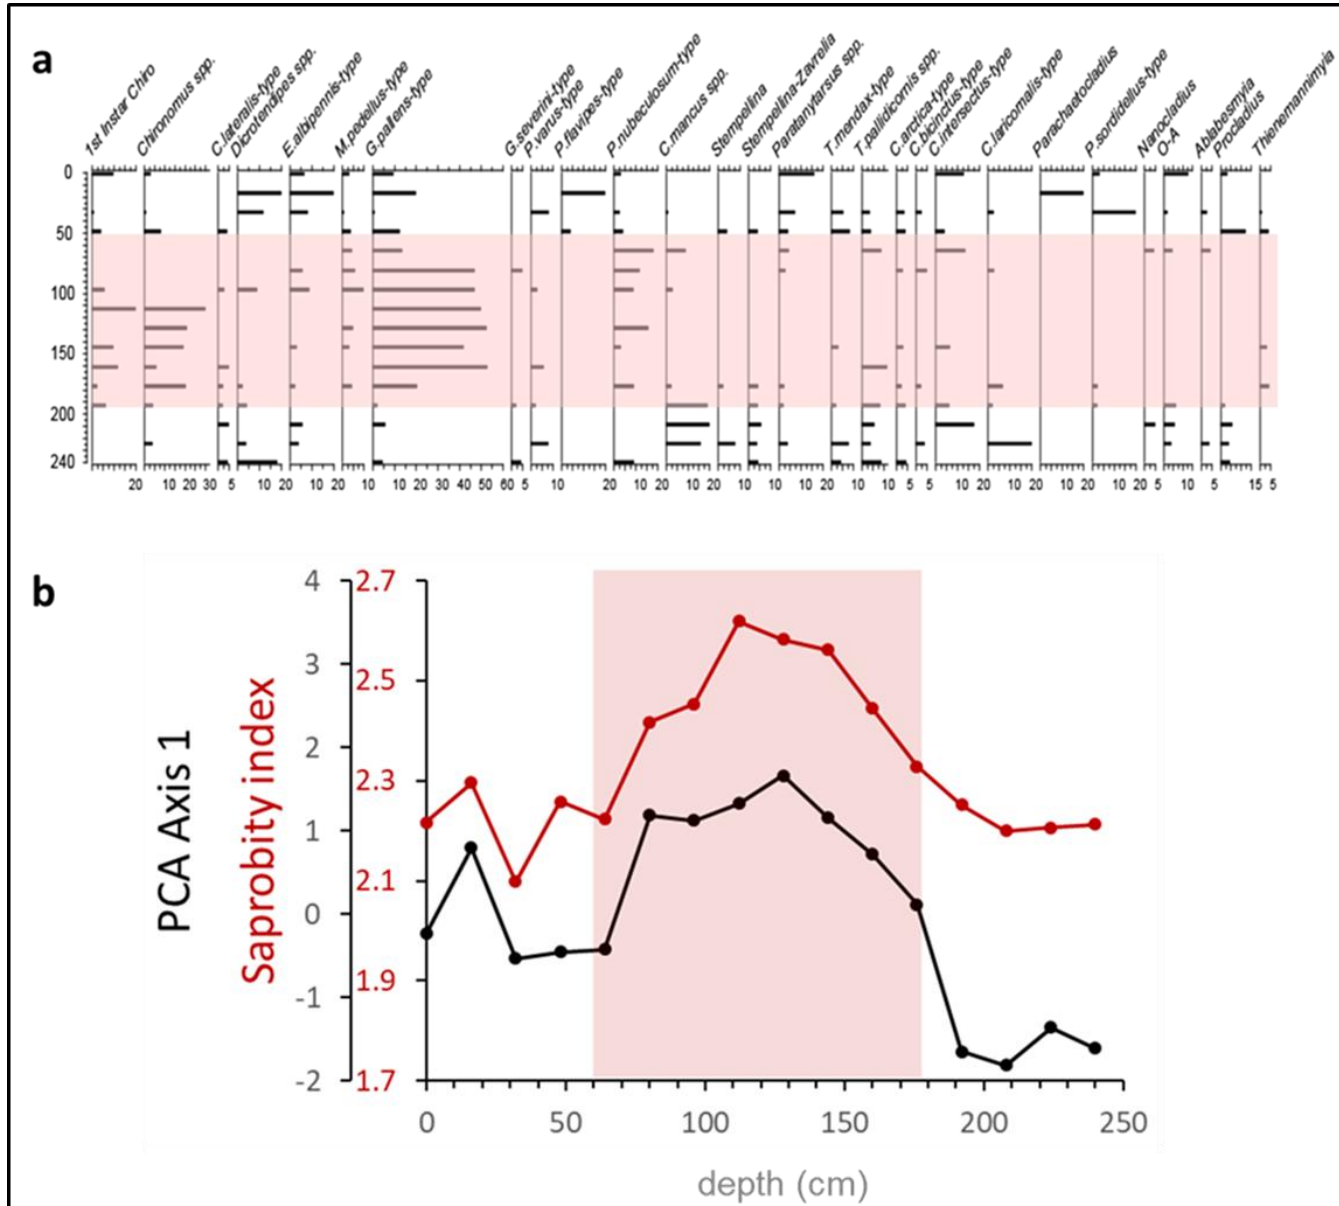

Fig. 6. Summary chironomid diagram for southern crannog lake core (LY12). Pink shading covers the levels that accumulated during the crannog period, (b) the saprobility index reconstruction alongside PCA axis 1 scores from chiromimids.

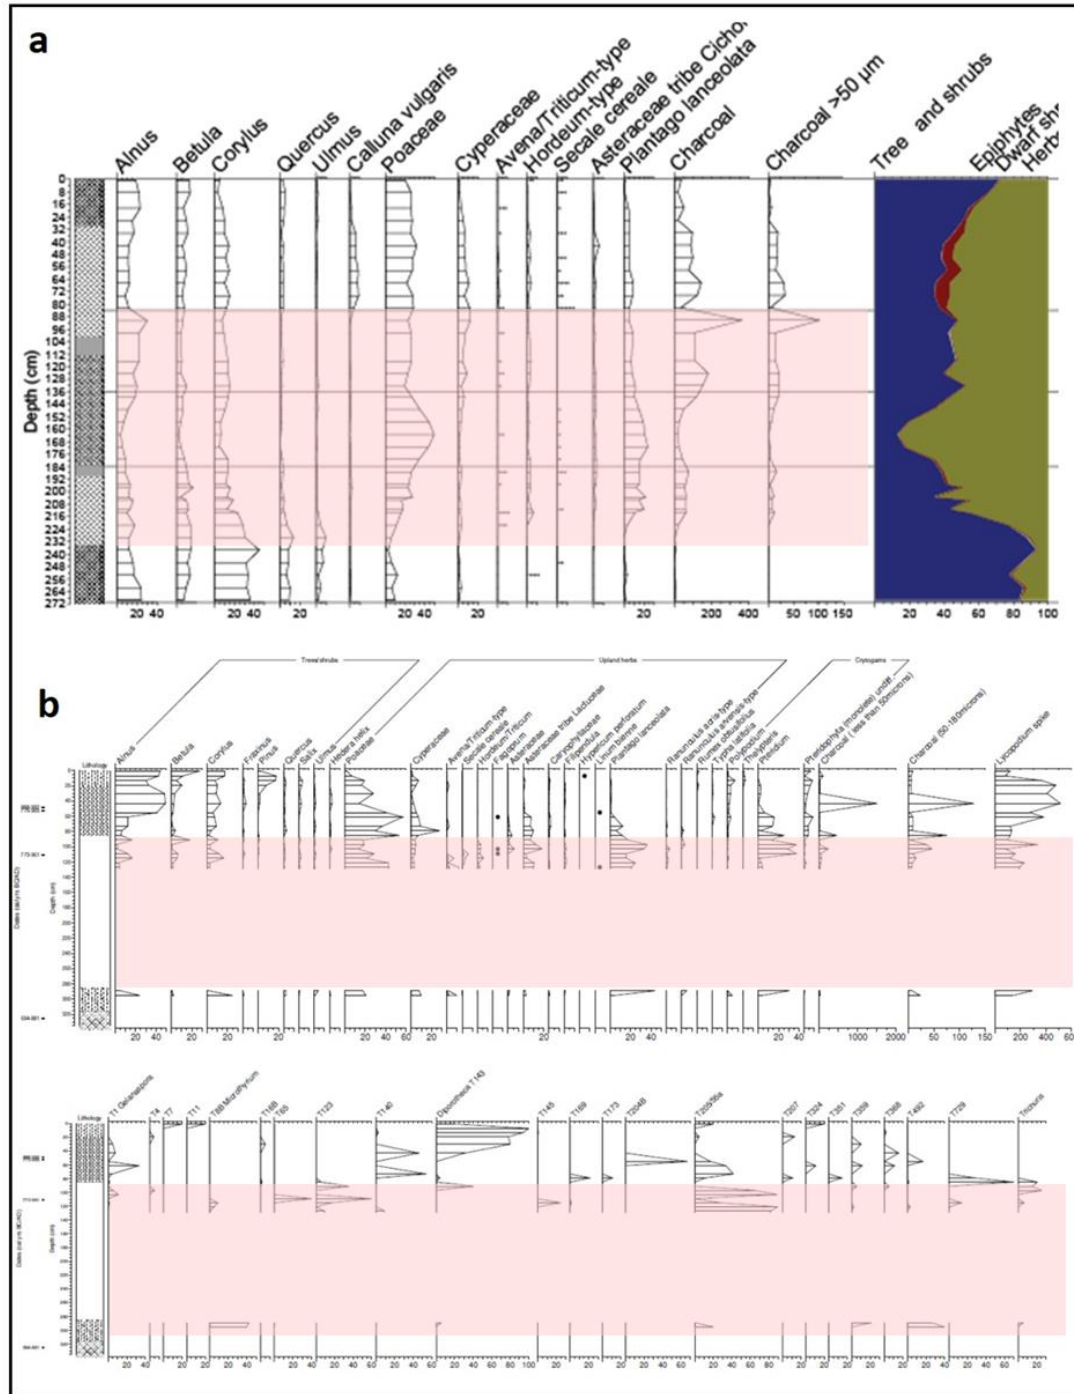

Fig. 7. Selected pollen and spore data from the southern crannog, (a) pollen and charcoal from the core adjacent to the crannog, (b) stratigraphy, 14C dates, selected pollen and NPPs, and Trichuris from the core through the southern crannog. Pink shading covers the levels that accumulated during the crannog period.



## Tables 1-4

| Location                                                     | Crannog                                    | Island diam. (m) | Dist. from shore (m) | Dates                                                    | Archaeological material                                                                                                                                         |
|--------------------------------------------------------------|--------------------------------------------|------------------|----------------------|----------------------------------------------------------|-----------------------------------------------------------------------------------------------------------------------------------------------------------------|
| Yoan (N)<br>Lat: 54°19'49.25<br>Long: 7°36'49.31<br>Alt: 51m | Northern crannog 'Gortgonnell/Killyherlin' | 26               | 30.5                 | 1044-1264 CE (pile)<br>777-994 CE                        | Whetstones, quernstones (Wood-Martin 1886) animal bone (2 incisor teeth, several fragments of bone, two fragments of ribs and part of a jaw-bone)(FCM_1978_133) |
| Yoan (N)<br>Lat: 54°19'38.64<br>Long: 7°36'30.63             | Northern crannog marginal core LY12        | (26)             | 26                   | 756-962 CE                                               | wood chips (this study)                                                                                                                                         |
| Yoan (S)<br>Lat: 54°19'38.21<br>Long: 7°36'29.46<br>Alt: 52m | Southern crannog 'Drumcrin' core LYSC      | 24               | causeway             | 943 CE (887-994)<br>870 CE (774-866)<br>858 CE (773-963) | fragment of rotary quern (FCM_1977_057) MUC x 3: decorated rim sherd, plain body sherd, base sherd (DoE), wood chips                                            |
| Yoan (S)<br>Lat: 54°19'48.73<br>Long: 7°36'49.10             | Southern crannog marginal core LY7         | (24)             | 35                   | 714-1103 CE                                              | wood chips                                                                                                                                                      |

Table 1. Descriptive statistics, including archaeology, of the two crannog islands and lake. Dates are calibrated 14C and use coarse woody debris and the start of the Ti rise as the basal crannog date in the cores (see text for discussion of dating criteria) and MUC is Medieval Ulster coarse-ware.

| Lab code (ORAU) | Sample code, depth (cm) | Material dated | Ident.                    | Raw 14C date BP | ± (1σ) | F <sup>14</sup> C | ± (1σ)  | δ <sup>13</sup> C |
|-----------------|-------------------------|----------------|---------------------------|-----------------|--------|-------------------|---------|-------------------|
| 43166           | LY12 25-26              | plant remains  | <i>Pteridium</i>          | 260             | 25     | 0.9681            | 0.00303 | -28.72            |
| 43167           | LY12 41-42              | seeds          | <i>Rubus</i>              | 921             | 26     | 0.89165           | 0.0029  | -27.32            |
| 41559           | LY12 59-61              | plant remains  | terrestrial leaf fragment | 821             | 33     | 0.90281           | 0.00374 | -27.86            |
| 43168           | LY12 87-88              | seeds          | <i>Prunus spinosa</i>     | 1146            | 25     | 0.8671            | 0.0027  | -25.15            |
| 42084           | LY12 109-110            | plant remains  |                           | 1142            | 26     | 0.86746           | 0.00283 | -27.14            |
| 43169           | LY12 146-147            | plant remains  | <i>Pteridium</i>          | 1173            | 25     | 0.86413           | 0.00273 | -26.13            |
| 43170           | LY12 165-166            | plant remains  | mixed plant remains       | 1249            | 26     | 0.85602           | 0.00275 | -28.35            |

|       |              |               |                           |      |    |         |         |        |
|-------|--------------|---------------|---------------------------|------|----|---------|---------|--------|
| 41561 | LY12 180-182 | plant remains | terrestrial leaf fragment | 1188 | 32 | 0.86251 | 0.00342 | -26.12 |
| 45184 | LY12 200     | plant remains | monocot stems             | 2016 | 26 | 0.77805 | 0.00257 | -43.16 |
| 43171 | LY12 217-218 | plant remains | cf. Dicranales            | 2205 | 45 | 0.75974 | 0.00435 | -42.33 |
| 43172 | LY12 244-245 | plant remains | cf. Dicranales            | 2443 | 28 | 0.73774 | 0.0026  | -39.60 |
| 43159 | LY7 23-24    | plant remains | cf. <i>Lemna</i>          | 342  | 24 | 0.9583  | 0.00283 | -27.23 |
| 43160 | LY7 49-50    | wood          | Unid.                     | 344  | 25 | 0.95804 | 0.003   | -28.16 |
| 43161 | LY7 79-80    | plant remains | <i>Prunus spinosa</i>     | 354  | 26 | 0.95686 | 0.00306 | -26.30 |
| 41557 | LY7 104-105  | plant remains | terrestrial leaf fragment | 1120 | 32 | 0.86989 | 0.00349 | -27.89 |
| 43162 | LY7 135-136  | wood          | Unid.                     | 1195 | 26 | 0.8618  | 0.00281 | -30.21 |
| 42083 | LY7 190-191  | plant remains | Unid.                     | 1305 | 33 | 0.8501  | 0.00346 | -27.41 |
| 45178 | LY7 214      | plant remains | <i>Pteridium</i>          | 1184 | 27 | 0.86297 | 0.00291 | -28.77 |
| 43870 | LY7 230-231b | sediment      | bulk sediment             | 2122 | 28 | 0.76789 | 0.00263 | -32.79 |
| 45179 | LY7 250      | sediment      | bulk sediment             | 2421 | 31 | 0.73979 | 0.00282 | -29.90 |
| 43164 | LY7 290-291  | sediment      | bulk sediment             | 2974 | 29 | 0.69059 | 0.0025  | -28.62 |
| 43165 | LY7 325-326  | sediment      | bulk sediment             | 4655 | 32 | 0.5602  | 0.00222 | -31.57 |
| 45180 | LYSC 50      | wood          | wood fragments            | 1103 | 26 | 0.87165 | 0.00282 | -27.39 |
| 45180 | LYSC 50      | wood          | wood fragments            | 1160 | 27 | 0.86551 | 0.00286 | -27.34 |
| 45181 | LYSC 110     | plant remains | <i>Pteridium</i>          | 1165 | 27 | 0.86504 | 0.00294 | -27.47 |
| 45182 | LYSC 275     | plant remains | terrestrial leaf fragment | 841  | 26 | 0.90061 | 0.00293 | -28.82 |
| 45183 | LYSC 325     | plant remains | terrestrial leaf fragment | 1226 | 25 | 0.85845 | 0.00264 | -29.21 |

Table 2. AMS Dates from, ORA (Oxford) for LY12, LY7 and LYSC.

| Event                                                                                                                                                                             | Date Estimate based on the preferred age-depth models with 95% range and mean age point |
|-----------------------------------------------------------------------------------------------------------------------------------------------------------------------------------|-----------------------------------------------------------------------------------------|
| <b>North crannog</b>                                                                                                                                                              |                                                                                         |
| Crannog establishment with bottom timber (188cm), which also coincides with the opening of the landscape and first increase in charcoal in pollen (in the pollen sample at 184cm) | 755-940 CE (95% CI) or 827 CE ± 44 (mean ± SD)                                          |
| Start of erosion (increasing Ti at 83cm) – <i>abandonment and end of the use</i>                                                                                                  | 883-990 CE (95% CI) or 936 CE ± 31 (mean ± SD)                                          |
| End coarse woody debris and charcoal (62cm)                                                                                                                                       | 1145-1256 CE (95% CI) or 1203 CE ± 29 (mean ± SD)                                       |
| <b>South crannog</b>                                                                                                                                                              |                                                                                         |
| Opening of the landscape (starting after 229cm depth)                                                                                                                             | 144 BCE – 6 CE (95% confidence interval)<br>61 ± 41 BCE (mean ± SD)                     |
| First charcoal in pollen slides (218cm depth)                                                                                                                                     | 85-390 CE (95% confidence interval)<br>236 CE ± 76 (mean ± SD)                          |
| Crannog establishment with bottom timber (202cm depth)                                                                                                                            | 605-751 CE (95% CI)<br>666 CE ± 41 (mean ± SD)                                          |
| Start of erosion (increasing Ti at 109cm) – <i>end of first phase of occupation/use</i>                                                                                           | 865-984 CE (95% CI)<br>921 CE ± 33 (mean ± SD)                                          |
| End of first phase with top timber (86 cm depth) - <i>abandonment</i>                                                                                                             | 871-1084 CE (95% CI)<br>986 CE ± 47 (mean ± SD)                                         |
| Start medieval reoccupation (from 86cm depth)                                                                                                                                     | 1441-1564 CE (95% CI)<br>1490 CE ± 25 (mean ± SD)                                       |
| End of medieval reoccupation (end of wood and charcoal at 30cm depth)                                                                                                             | 1480-1587 CE (95% CI)<br>1527 CE ± 26 (mean ± SD)                                       |

Table 3. Chronologies from cores for the north and south crannogs

| Sample depth (cm) | Bile acid concentrations (µg/g) |      |             |      | DCA:LCA | DCA:LCA faecal source* | CDCA faecal source* | Identification of faecal source based on all bile acids |
|-------------------|---------------------------------|------|-------------|------|---------|------------------------|---------------------|---------------------------------------------------------|
|                   | LCA                             | DCA  | CDCA        | HDCA |         |                        |                     |                                                         |
| 32                | 0.24                            | 0.83 | <i>0.11</i> | -    | 3.45    | Human/horse            | Human/goat/horse    | Human/horse                                             |
| 48                | -                               | -    | -           | -    | n/a     |                        |                     |                                                         |
| 60                | <i>0.30</i>                     | 3.47 | <i>0.11</i> | -    | 11.39   | Cattle/sheep/goats     | Human/goat/horse    | Dominated by cattle/sheep/goats but mixed source        |
| 68                | <i>0.10</i>                     | 1.75 | -           | -    | 17.12   | Cattle/sheep/goats     |                     | Dominated by cattle/sheep/goats                         |
| 76                | 0.58                            | 4.33 | <i>0.10</i> | -    | 7.50    | Cattle/sheep/goats     | Human/goat/horse    | Dominated by cattle/sheep/goats but mixed source        |
| 84                | 4.14                            | -    | -           | -    | n/a     |                        |                     |                                                         |
| 92                | 2.23                            | 1.93 | -           | -    | 0.86    | Human/horse            |                     | Human/horse                                             |
| 100               | 1.60                            | -    | 0.52        | -    | n/a     |                        | Human/goat/horse    | Human/horse                                             |
| 108               | 0.57                            | 2.39 | -           | -    | 4.22    | Human/horse            |                     | Human/horse                                             |
| 116               | 1.03                            | -    | -           | -    | n/a     |                        |                     |                                                         |
| 124               | 0.57                            | 3.59 | -           | -    | 6.32    | Cattle/sheep/goats     |                     | Dominated by Cattle/sheep/goats                         |
| 128               | -                               | -    | -           | -    | n/a     |                        |                     |                                                         |
| 132               | 0.36                            | 2.03 | -           | -    | 5.63    | Cattle/sheep/goats     |                     | Dominated by Cattle/sheep/goats                         |
| 140               | 2.81                            | 3.69 | -           | -    | 1.31    | Human/horse            |                     | Human/horse                                             |
| 148               | 0.56                            | 4.18 | -           | -    | 7.44    | Cattle/sheep/goats     |                     | Dominated by cattle/sheep/goats                         |
| 156               | 0.64                            | 6.30 | -           | -    | 9.84    | Cattle/sheep/goats     |                     | Dominated by cattle/sheep/goats                         |
| 168               | 0.37                            | 0.88 | -           | -    | 2.36    | Human/horse            |                     | Human/horse                                             |
| 180               | <i>0.06</i>                     | 0.99 | -           | -    | 16.13   | Cattle/sheep/goats     |                     | Dominated by cattle/sheep/goats                         |
| 240               | -                               | -    | -           | -    | n/a     |                        |                     |                                                         |
| 294               | <i>0.07</i>                     | 0.91 | -           | -    | 14.01   | Cattle/sheep/goats     |                     |                                                         |

Table 4. Results of lipid biomarkers analysis of northern core (LY12). Values in italics fall below the detection/quantification limit (ca. 0.4 µg/g).

## DNA Methods Text: Methodology and contamination procedures.

Metabarcoding was chosen as the target organisms were vascular plants and mammals, and as high taxonomic precision as possible was required to compare with the archaeology of this and other sites. The sedaDNA and lipid biomarkers in lake sediments are known to be fixed soon after sediment deposition<sup>20,53,54,55,56</sup> and are not subject to leaching or vertical movement in the sediment column. This has been specifically tested for sedaDNA in similar lakes in Scotland UK<sup>57</sup>. This also applies to other proxies such as pollen, diatoms and chironomids<sup>58</sup>.

A potential problem for this type of analysis is contamination either in the field during extraction, sampling and laboratory analyses. We minimized the risk of contamination in the field by using a wide diameter (10cm) corer which was dosed with exotic DNA (pineapple) which was not detected in any of the samples. The core was also only opened in a clean laboratory and all sampling followed DNA clean procedures in a dedicated aDNA laboratory (LECA, Grenoble). There is also a known risk of contamination by the DNA from domestic animals both from the laboratory and reagents<sup>59</sup>. To take this issue into account, we run a large number of controls (9 controls, with 8 PCR replicates each). The amplification of domestic animals in controls was extremely low (Supplementary Table 5 below). Amplification rate in controls was zero for most of mammals (*Bos*, *Sus scrofa*, *Equus*, *Cervus*), was low for *Ovis aries* (1.4% of controls), while it was moderate for *Capra hircus* (6.9% of controls). In order to take into account the risk of false positives, we run species detection occupancy modelling (SODM) that integrate the occurrence of both false-positive and false-negative errors (see Chen and Ficetola<sup>15,60</sup> and others<sup>61</sup>). These models estimate species occupancy and also the rate of false detections; the frequency of contamination into the controls (upper 99% credible interval) was included in SODM as prior for the frequency of false positives. The estimates of species occupancy reported in our manuscript are corrected taking into account the rate of false positives. In practice, each sample was analyzed in multiple PCR replicates, and was considered only if multiple PCR replicates confirm the sedaDNA detection.

| Species             | Observed rate of contamination | 95% CI       |
|---------------------|--------------------------------|--------------|
| <i>Bos</i>          | 0.00                           | 0.00 – 0.03  |
| <i>Sus scrofa</i>   | 0.00                           | 0.00 – 0.03  |
| <i>Equus</i>        | 0.00                           | 0.00 – 0.03  |
| <i>Cervus</i>       | 0.00                           | 0.00 – 0.03  |
| <i>Ovis aries</i>   | 0.013                          | 0.001 – 0.06 |
| <i>Capra hircus</i> | 0.069                          | 0.027 – 0.15 |

Table 5. Mammal results from negative controls given as the rate of contamination for the 6 detected species, as well as the estimated 95% CIs of the contamination rate (calculated as confidence intervals for binomial proportions using the Jeffreys' method<sup>62</sup>).

## Additional References

53. Gigout Covex, C. et al. New insights on lake sediment DNA from the catchment: importance of taphonomic and analytical issues on the record quality. *Scientific Reports* 9, 14676 (2019).
54. Capo, E. et al. Optimizing the experimental procedure to analyze ancient DNA preserved within lake sedimentary archives. Guidelines for future research using lake sedimentary DNA to track historical changes in terrestrial and aquatic ecosystems. *Quaternary MDPI* (2021).
55. Haile, J., et al. (2007). "Ancient DNA chronology within sediment deposits: are paleobiological reconstructions possible and is DNA leaching a factor?" *Molecular Biology and Evolution* 24: 982-989.
56. Parducci, L., et al. (2017). "Transley Reviews: Ancient plant DNA from lake sediments." *New Phytologist* 214(3): 924-942.
57. Sjögren, P. *et al.* Lake sedimentary DNA accurately records 20th Century introductions of exotic conifers in Scotland. *New Phytologist* 213, 929-941 (2017) doi:10.1111/nph.14199
58. Birks, H.H. & Birks, H.J.B. Multi-proxy studies in palaeolimnology. *Vegetation History and Archaeobotany* 15: 235-251 (2006) 10.1007/s00334-006-0066-6
59. Leonard, J. A., Shanks, O., Hofreiter, M., Kreuz, E., Hodges, L., Ream, W., Wayne, R.K. & Fleischer, R. C. Animal DNA in PCR reagents plagues ancient DNA research. *Journal of Archaeological Science* 34, 1361-1366 (2007).
60. Chen, W. & Ficetola, F. Conditionally autoregressive models improve occupancy analyses of autocorrelated data : An example with environmental DNA. *Molecular Ecology Resources* 19, 163-175 (2019).
61. Lahoz-Monfort, J.J., Guillera-Arroita, G. and Tingley, R. Statistical approaches to account for false-positive errors in environmental DNA samples. *Molecular Ecology Resources* 16, 673–685 (2016).
62. Brown LD, Cai TT, DasGupta A. Interval estimation for a binomial proportion. *Stat Sci* 16, 101-117 (2001).
